# Supplementary material
Source: PubMed Central journal article supplement (PMC2413117)
Supplement: 10719_2007_9081_MOESM2_ESM.pdf [file 10719_2007_9081_MOESM2_ESM.pdf]

Supporting Table 2. Calculated model-free parameters for the tetra-, hexa- and octa-saccharides (**1**, **2** and **3** respectively) of the NA-domain of heparan sulfate, using a constant internal correlation time of 30 ps, fitted to isotropic and anisotropic models of rotational diffusion. These values were calculated from experimental data collected at three magnetic-field strengths (14.1, 18.1 and 21.1 T). The  $S^2_{\text{calc}}$  and  $\alpha_{\text{calc}}$  values were calculated by averaging data extracted from 50 ns molecular dynamics simulations. In contrast to Table 2 (where a value of 1.01Å was used for the N-H distance) a value of 1.02Å was used for the N-H distance in model free analysis.

| Isotropic     |      |          | $S^2$ | $S^2_{\text{calc}}$ |
|---------------|------|----------|-------|---------------------|
| <b>1</b>      |      |          |       |                     |
| $\tau_M$ [ns] | 0.55 | $\alpha$ | 0.35  | 0.46                |
| $\tau_e$ [ns] | 0.03 | $\beta$  | 0.38  | 0.59                |
|               |      | $\omega$ | 0.52  | 0.62                |
| <b>2</b>      |      |          |       |                     |
| $\tau_M$ [ns] | 0.68 | $\alpha$ | 0.37  | 0.49                |
| $\tau_e$ [ns] | 0.03 | $\beta$  | 0.39  |                     |
|               |      | $\gamma$ | 0.64  | 0.70                |
|               |      | $\omega$ | 0.59  | 0.61                |
| <b>3</b>      |      |          |       |                     |
| $\tau_M$ [ns] | 0.74 | $\alpha$ | 0.35  |                     |
| $\tau_e$ [ns] | 0.03 | $\beta$  | 0.38  |                     |
|               |      | $\gamma$ | 0.93  |                     |
|               |      | $\psi$   | 0.88  |                     |
|               |      | $\omega$ | 0.74  |                     |

(see over for anisotropic data).

| Anisotropic                     |      |          | $S^2$ | $\alpha[^\circ]$ | $S^2_{\text{calc}}$ | $\alpha_{\text{calc}}[^\circ]$ |
|---------------------------------|------|----------|-------|------------------|---------------------|--------------------------------|
| <b>1</b>                        |      |          |       |                  |                     |                                |
| $\tau_{\parallel}$ [ns]         | 0.35 | $\alpha$ | 0.32  | 7.3              | 0.46                | 64.2                           |
| $\tau_{\perp}$ [ns]             | 0.63 | $\beta$  | 0.39  | 42.3             | 0.59                | 62.1                           |
| $\tau_{\perp}/\tau_{\parallel}$ | 1.77 | $\omega$ | 0.55  | 57.5             | 0.62                | 63.1                           |
| $\tau_e$ [ns]                   | 0.03 |          |       |                  |                     |                                |
| <b>2</b>                        |      |          |       |                  |                     |                                |
| $\tau_{\parallel}$ [ns]         | 0.56 | $\alpha$ | 0.33  | 5.5              | 0.49                | 62.8                           |
| $\tau_{\perp}$ [ns]             | 0.75 | $\beta$  | 0.39  | 54.0             |                     |                                |
| $\tau_{\perp}/\tau_{\parallel}$ | 1.34 | $\gamma$ | 0.66  | 57.3             | 0.70                | 64.4                           |
| $\tau_e$ [ns]                   | 0.03 | $\omega$ | 0.65  | 85.7             | 0.61                | 63.3                           |
| <b>3</b>                        |      |          |       |                  |                     |                                |
| $\tau_{\parallel}$ [ns]         | 0.38 | $\alpha$ | 0.42  | 72.3             |                     |                                |
| $\tau_{\perp}$ [ns]             | 0.98 | $\beta$  | 0.45  | 65.2             |                     |                                |
| $\tau_{\perp}/\tau_{\parallel}$ | 2.57 | $\gamma$ | 0.68  | 2.5              |                     |                                |
| $\tau_e$ [ns]                   | 0.03 | $\psi$   | 0.70  | 23.0             |                     |                                |
|                                 |      | $\omega$ | 0.58  | 32.0             |                     |                                |
